# Supplementary material
Source: publisher figshare collection journal article supplement (https://karger.figshare.com/ndownloader/files/27950751)
Supplement: Supplementary file 1 [file 27950751]

## Sheet: Table S3 
Table S3: The complete results of GSEA
Days		Mechanisms	setSize	ES	NES	P-value	qvalues
PN14	1	RNA-seq: ER-stress	311	0.35645	1.4685	0.00143062	0.00166945
	2	RNA-seq: Pyroptosis	59	0.737308	2.4171	0.00166945	0.00166945
	3	CRISPR Library: Caspase11 dependent pyroptosis	30	0.520327	1.46296	0.0372881	0.0513047
	4	CRISPR Library: Sensitizers of H2O2 induced oxidative stress	24	0.539381	1.44557	0.0487395	0.0513047
	5	CRISPR Library: Sensitizers of Tunicamycin induced ER-stress	73	0.250893	0.853687	0.73752	0.517558
	6	CRISPR Library: NLRP1B-mediated pyroptosis	92	-0.174699	-0.63764	0.997199	0.524842
	7	CRISPR Library: Protectors of Tunicamycin induced ER-stress	103	0.330526	1.19187	0.155624	0.50571
	8	CRISPR Library: CHOP-related ER-stress	98	0.301265	1.07973	0.320373	0.50571
	9	CRISPR Library: Protectors of H2O2 induced oxidative stress	98	0.27046	0.969326	0.496112	0.50571
	10	CRISPR Library: NRF2-related cellular homeostasis	61	0.292803	0.964463	0.50571	0.50571
PN21	1	RNA-seq: Pyroptosis	59	0.569576	2.19685	0.00990099	0.0104221
	2	RNA-seq: ER-stress	298	-0.216212	-0.664098	0.993982	0.523148
	3	CRISPR Library: Caspase11 dependent pyroptosis	29	0.376218	1.22801	0.195238	0.526316
	4	CRISPR Library: NLRP1B-mediated pyroptosis	100	0.266284	1.11021	0.263158	0.526316
	5	CRISPR Library: Sensitizers of Tunicamycin induced ER-stress	50	-0.344268	-0.939281	0.569794	0.700375
	6	CRISPR Library: Sensitizers of H2O2 induced oxidative stress	32	-0.327452	-0.840222	0.700375	0.700375
	7	CRISPR Library: NRF2-related cellular homeostasis	104	-0.358725	-1.05444	0.403583	0.902083
	8	CRISPR Library: Protectors of Tunicamycin induced ER-stress	112	-0.342852	-1.0152	0.451042	0.902083
	9	CRISPR Library: CHOP-related ER-stress	103	-0.280174	-0.823322	0.781646	0.987074
	10	CRISPR Library: Protectors of H2O2 induced oxidative stress	44	-0.190416	-0.513894	0.987074	0.987074
PN35	1	RNA-seq: Pyroptosis	49	0.531548	1.94205	0.00869565	0.0183066
	2	RNA-seq: ER-stress	276	-0.292006	-0.852273	0.840522	0.591553
	3	RNA-seq: Oxidative stress	11	-0.332458	-0.682002	0.842963	0.591553
	4	CRISPR Library: Caspase11 dependent pyroptosis	35	0.304893	1.05012	0.35119	0.930464
	5	CRISPR Library: NLRP1B-mediated pyroptosis	100	0.233787	0.991505	0.522727	0.930464
	6	CRISPR Library: Sensitizers of Tunicamycin induced ER-stress	31	-0.329849	-0.82222	0.714631	0.930464
	7	CRISPR Library: Sensitizers of H2O2 induced oxidative stress	62	-0.239864	-0.651298	0.930464	0.930464
	8	CRISPR Library: Protectors of Tunicamycin induced ER-stress	109	-0.465904	-1.31014	0.0607621	0.243048
	9	CRISPR Library: NRF2-related cellular homeostasis	101	-0.403595	-1.12606	0.280374	0.560748
	10	CRISPR Library: CHOP-related ER-stress	104	-0.364862	-1.02356	0.465979	0.621306
	11	CRISPR Library: Protectors of H2O2 induced oxidative stress	53	-0.13057	-0.347431	1	1
qvalue:cut.off=25%
